# Supplementary material for: BET protein inhibition sensitizes glioblastoma cells to temozolomide treatment by attenuating MGMT expression
Source: PubMed Central journal article supplement (PMC9747918; doi:10.1038/s41419-022-05497-y), 2022-12-13
Supplement: 41419_2022_5497_MOESM1_ESM.pdf [file 41419_2022_5497_MOESM1_ESM.pdf]

## Supplementary Tables and Figures

### Content:

**Supplementary Table S1.** MGMT promoter methylation status cell lines & sphere lines

**Supplementary Table S2.** Primer sequences.

**Supplementary Table S3.** Description of the 169 DDR genes affected by JQ1 treatment.

*Description:* The table contains gene expression levels, DDR annotation and classification of the genes into the six JQ1-treatment-related response profiles. See separate excel file.

**Supplementary Table S4.** Statistical details of comparisons in Figure 2

**Supplementary Table S5.** Statistical details of comparisons in Figure 4

**Supplementary Table S6.** Statistical details of comparisons in Figure 5A

**Supplementary Table S7.** Statistical details of comparisons in Figure 5B

**Supplementary Table S8.** Statistical details of comparisons in Figure 6A

**Supplementary Table S8.** Statistical details of comparisons in Figure 6C

### Supplementary Figures S1-S8

### References

**Supplementary Table S1.****A *MGMT* promoter methylation status of cell lines & sphere lines**

| <b>Cell lines &amp; Sphere lines</b> | <b>*<i>MGMT</i> methylation status</b> | <b>Reference</b>           |
|--------------------------------------|----------------------------------------|----------------------------|
| LN-18                                | U                                      | Sciuscio <i>et al</i> 2011 |
| LN-229                               | M                                      | Sciuscio <i>et al</i> 2011 |
| LN-340                               | U/M                                    |                            |
| LN-382                               | U/M                                    |                            |
| T98G                                 | U/M                                    |                            |
| LN-2683GS                            | U/M                                    | Sciuscio <i>et al</i> 2011 |
| LN-4372GS                            | U/M                                    |                            |
| MDA-GSC-23 (GSC23, RRID:CVCL_DR59)   | U/M                                    |                            |

\*Status determined by Methylation Specific PCR (MSP) <sup>1,2</sup>

Abbreviations: U, unmethylated; M, methylated; U/M, unmethylated and methylated  
Sciuscio *et al.* 2011 <sup>3</sup>

**B STR Finger print of LN-4372GS and corresponding PBMC**

| <b>Marker</b>     | <b>LN-4372GS</b> | <b>TuBa 4372 PBMCs</b> |
|-------------------|------------------|------------------------|
| <b>Amelogenin</b> | XY               | XY                     |
| <b>D3S1358</b>    | 15 - 18          | 15 - 18                |
| <b>D1S1656</b>    | 13 - 15.3        | 13 - 15.3              |
| <b>D2S441</b>     | 11               | 11                     |
| <b>D10S1248</b>   | 15               | 15                     |
| <b>D13S317</b>    | 14               | 8 - 14                 |
| <b>Penta_E</b>    | 7 - 12           | 7 - 12                 |
| <b>D16S539</b>    | 11 - 13          | 11 - 13                |
| <b>D18S51</b>     | 13 - 17          | 13 - 17                |
| <b>D2S1338</b>    | 20 - 25          | 20 - 25                |
| <b>CSF1PO</b>     | 11 - 12          | 11 - 12                |
| <b>Penta_D</b>    | 11 - 12          | 11 - 12                |
| <b>TH01</b>       | 7 - 8            | 7 - 8                  |
| <b>vWA</b>        | 15 - 17          | 15 - 17                |
| <b>D21S11</b>     | 28 - 30          | 28 - 30                |
| <b>D7S820</b>     | 9 - 11           | 9 - 11                 |
| <b>D5S818</b>     | 9 - 11           | 9 - 11                 |
| <b>TPOX</b>       | 8 - 9            | 8 - 9                  |
| <b>D8S1179</b>    | 15               | 15                     |
| <b>D12S391</b>    | 19 - 22          | 19 - 22                |
| <b>D19S433</b>    | 13 - 14          | 13 - 14                |
| <b>SE33</b>       | 20.2 - 31.2      | 20.2 - 31.2            |
| <b>D22S1045</b>   | 16               | 16 - 17                |
| <b>FGA</b>        | 21 - 23          | 21 - 23                |

**Supplementary Table S2****A qPCR primers**

| <b>Gene</b>   | <b>Forward primer (5'-3')</b> | <b>Reverse primer (5'-3')</b> |
|---------------|-------------------------------|-------------------------------|
| <i>GAPDH</i>  | AGGTGAAGGTCGGAGTCAACG         | CGTTCTCAGCCTTGACGGTG          |
| <i>HEXIM1</i> | AAGGACTAGCTAAAGGCGTCAC        | TGGCTAGTAGAGTCCTCGAAGTTT      |
| <i>MGMT</i>   | GCTGCGGTTCTCGGAGGTC           | CTGCCAGGGCTGCTAATTGC          |
| <i>MSH6</i>   | CACCAGGAGATTTGGTTTGG          | TGTTGGGCTGTCATCAAAAA          |
| <i>MSH2</i>   | GACCGGGGCGACTTCTATAC          | GCCCCATGTACTTGATCACC          |

**B ChIP-qPCR primers**

| <b>Gene</b>             | <b>Forward primer (5'-3')</b> | <b>Reverse primer (5'-3')</b> |
|-------------------------|-------------------------------|-------------------------------|
| <i>MGMT_F2</i>          | AAAAGGTACGGGCCATTTG           | CAGTCTGCGCATCCTCG             |
| <i>MGMT_F3</i>          | GCGCTCTCTTGCTTTTCTCA          | GACACTCACCAAGTCGCAAA          |
| <i>H19</i>              | Undisclosed – Diagenode Kit   | Undisclosed – Diagenode Kit   |
| <i>Myoglobin exon 2</i> | Undisclosed – Diagenode Kit   | Undisclosed – Diagenode Kit   |

**Supplementary Table S4:** Supplementary Statistics to Figure 2A

| Cell lines       | ANOVA table | SS      | DF | MS       | F (DFn, DFd)              | P value  |
|------------------|-------------|---------|----|----------|---------------------------|----------|
| <b>LN-340</b>    | Time x Trt  | 0.1529  | 6  | 0.02548  | F (6, 18) = 0.5471        | P=0.7658 |
|                  | Time        | 0.9419  | 3  | 0.314    | F (1.738, 10.43) = 6.742  | P=0.0153 |
|                  | Trt         | 1.097   | 2  | 0.5487   | F (2, 6) = 11.56          | P=0.0087 |
|                  | Subject     | 0.2847  | 6  | 0.04745  | F (6, 18) = 1.019         | P=0.4443 |
|                  | Residual    | 0.8383  | 18 | 0.04657  |                           |          |
| <b>T98G</b>      | Time x Trt  | 0.2745  | 6  | 0.04575  | F (6, 18) = 1.293         | P=0.3098 |
|                  | Time        | 0.1817  | 3  | 0.06058  | F (1.829, 10.97) = 1.712  | P=0.2254 |
|                  | Trt         | 0.5377  | 2  | 0.2689   | F (2, 6) = 5.300          | P=0.0472 |
|                  | Subject     | 0.3044  | 6  | 0.05073  | F (6, 18) = 1.433         | P=0.2562 |
|                  | Residual    | 0.637   | 18 | 0.03539  |                           |          |
| <b>LN-2683GS</b> | Time x Trt  | 0.0682  | 6  | 0.01137  | F (6, 18) = 1.860         | P=0.1436 |
|                  | Time        | 0.5984  | 3  | 0.1995   | F (1.529, 9.174) = 32.64  | P=0.0001 |
|                  | Trt         | 2.59    | 2  | 1.295    | F (2, 6) = 330.2          | P<0.0001 |
|                  | Subject     | 0.02354 | 6  | 0.003923 | F (6, 18) = 0.6418        | P=0.6958 |
|                  | Residual    | 0.11    | 18 | 0.006112 |                           |          |
| <b>LN-4372GS</b> | Time x Trt  | 0.1366  | 6  | 0.02276  | F (6, 9) = 0.2850         | P=0.9298 |
|                  | Time        | 0.22    | 3  | 0.07333  | F (1.491, 4.473) = 0.9180 | P=0.4324 |
|                  | Trt         | 2.079   | 2  | 1.039    | F (2, 3) = 46.43          | P=0.0055 |
|                  | Subject     | 0.06716 | 3  | 0.02239  | F (3, 9) = 0.2802         | P=0.8384 |
|                  | Residual    | 0.7189  | 9  | 0.07988  |                           |          |

**Supplementary Table S5:** Supplementary Statistics to Figure 4

| Cell lines            | ANOVA table | SS      | DF | MS     | F (DFn, DFd)      | P value  |
|-----------------------|-------------|---------|----|--------|-------------------|----------|
| LN-340                | Treatment   | 1798496 | 7  | 256928 | F (7, 16) = 16.53 | P<0.0001 |
|                       | Residual    | 248636  | 16 | 15540  |                   |          |
|                       | Total       | 2047132 | 23 |        |                   |          |
| LN-229MGMT+C12_NO DOX | Treatment   | 1537781 | 7  | 219683 | F (7, 16) = 5.780 | P=0.0018 |
|                       | Residual    | 608072  | 16 | 38004  |                   |          |
|                       | Total       | 2145853 | 23 |        |                   |          |
| LN-229MGMT+C12_DOX    | Treatment   | 1065768 | 7  | 152253 | F (7, 16) = 7.332 | P=0.0005 |
|                       | Residual    | 332242  | 16 | 20765  |                   |          |
|                       | Total       | 1398010 | 23 |        |                   |          |

**Supplementary Table S6:** Supplementary Statistics to Figure 5A

| Cell lines | Fixed effects (type III) | P value | F (DFn, DFd)      |
|------------|--------------------------|---------|-------------------|
| LN-340     | JQ1                      | <0.0001 | F (1, 23) = 104.4 |
|            | O6BG                     | 0.0347  | F (1, 23) = 5.038 |
|            | TMZ                      | <0.0001 | F (1, 23) = 112.8 |
|            | JQ1 x O6BG               | 0.2746  | F (1, 23) = 1.253 |
|            | JQ1 x TMZ                | 0.006   | F (1, 23) = 9.165 |
|            | O6BG x TMZ               | 0.0123  | F (1, 23) = 7.375 |
|            | JQ1 x O6BG x TMZ         | 0.1736  | F (1, 23) = 1.972 |
|            |                          |         |                   |
| T98G       | JQ1                      | <0.0001 | F (1, 8) = 561.8  |
|            | O6BG                     | 0.0523  | F (1, 12) = 4.637 |
|            | TMZ                      | <0.0001 | F (1, 12) = 104.3 |
|            | JQ1 x O6BG               | 0.0122  | F (1, 8) = 10.40  |
|            | JQ1 x TMZ                | <0.0001 | F (1, 8) = 55.99  |
|            | O6BG x TMZ               | 0.1735  | F (1, 12) = 2.094 |
|            | JQ1 x O6BG x TMZ         | 0.0969  | F (1, 8) = 3.535  |
|            |                          |         |                   |

**Supplementary Table S7:** Supplementary Statistics to Figure 5B

| ANOVA table      | SS       | DF | MS       | F (DFn, DFd)       | P value  |
|------------------|----------|----|----------|--------------------|----------|
| JQ1              | 0.1918   | 1  | 0.1918   | F (1, 24) = 12.35  | P=0.0018 |
| TMZ              | 3.743    | 1  | 3.743    | F (1, 24) = 241.0  | P<0.0001 |
| O6BG             | 0.06672  | 1  | 0.06672  | F (1, 24) = 4.295  | P=0.0491 |
| JQ1 x TMZ        | 0.003787 | 1  | 0.003787 | F (1, 24) = 0.2438 | P=0.6260 |
| JQ1 x O6BG       | 0.04604  | 1  | 0.04604  | F (1, 24) = 2.964  | P=0.0980 |
| TMZ x O6BG       | 0.007965 | 1  | 0.007965 | F (1, 24) = 0.5128 | P=0.4808 |
| JQ1 x TMZ x O6BG | 0.002526 | 1  | 0.002526 | F (1, 24) = 0.1626 | P=0.6903 |
| Residual         | 0.3728   | 24 | 0.01553  |                    |          |

**Supplementary Table S8:** Supplementary Statistics to Figure 6A

| Cell line   | ANOVA table | SS     | DF | MS      | F (DFn, DFd)             | P value  |
|-------------|-------------|--------|----|---------|--------------------------|----------|
| LN-340_MSH6 | Time x Trt  | 0.3011 | 9  | 0.03346 | F (9, 24) = 0.5867       | P=0.7950 |
|             | Time        | 3.081  | 3  | 1.027   | F (1.363, 10.91) = 18.01 | P=0.0008 |
|             | Trt         | 0.5032 | 3  | 0.1677  | F (3, 8) = 2.488         | P=0.1347 |
|             | Subject     | 0.5395 | 8  | 0.06743 | F (8, 24) = 1.182        | P=0.3497 |
|             | Residual    | 1.369  | 24 | 0.05703 |                          |          |
| LN-340_MSH2 | Time x Trt  | 1.415  | 9  | 0.1573  | F (9, 24) = 1.676        | P=0.1502 |
|             | Time        | 4.888  | 3  | 1.629   | F (1.784, 14.27) = 17.36 | P=0.0002 |
|             | Trt         | 0.2405 | 3  | 0.08015 | F (3, 8) = 0.6038        | P=0.6307 |
|             | Subject     | 1.062  | 8  | 0.1327  | F (8, 24) = 1.414        | P=0.2410 |
|             | Residual    | 2.253  | 24 | 0.09386 |                          |          |

**Supplementary Table S9:** Supplementary Statistics to Figure 6C

| cell lines     | ANOVA table      | SS     | DF | MS     | F (DFn, DFd)        | P value  |
|----------------|------------------|--------|----|--------|---------------------|----------|
| LN-340shMSH6#1 | JQ1              | 224.8  | 1  | 224.8  | F (1, 8) = 10.70    | P=0.0113 |
|                | O6BG             | 749.2  | 1  | 749.2  | F (1, 8) = 6.047    | P=0.0394 |
|                | TMZ              | 1689   | 1  | 1689   | F (1, 8) = 13.63    | P=0.0061 |
|                | JQ1 x O6BG       | 96.65  | 1  | 96.65  | F (1, 8) = 4.599    | P=0.0643 |
|                | JQ1 x TMZ        | 415.3  | 1  | 415.3  | F (1, 8) = 19.76    | P=0.0022 |
|                | O6BG x TMZ       | 187.8  | 1  | 187.8  | F (1, 8) = 1.515    | P=0.2533 |
|                | JQ1 x O6BG x TMZ | 72.72  | 1  | 72.72  | F (1, 8) = 3.460    | P=0.0999 |
|                | Subject          | 991.2  | 8  | 123.9  |                     |          |
|                | Residual         | 168.1  | 8  | 21.01  |                     |          |
| LN-340shMSH6#2 | JQ1              | 1288   | 1  | 1288   | F (1, 12) = 58.65   | P<0.0001 |
|                | O6BG             | 1231   | 1  | 1231   | F (1, 12) = 8.776   | P=0.0119 |
|                | TMZ              | 3872   | 1  | 3872   | F (1, 12) = 27.60   | P=0.0002 |
|                | JQ1 x O6BG       | 19.25  | 1  | 19.25  | F (1, 12) = 0.8765  | P=0.3676 |
|                | JQ1 x TMZ        | 586.8  | 1  | 586.8  | F (1, 12) = 26.72   | P=0.0002 |
|                | O6BG x TMZ       | 12.48  | 1  | 12.48  | F (1, 12) = 0.08897 | P=0.7706 |
|                | JQ1 x O6BG x TMZ | 8.226  | 1  | 8.226  | F (1, 12) = 0.3746  | P=0.5519 |
|                | Subject          | 1683   | 12 | 140.3  |                     |          |
|                | Residual         | 263.5  | 12 | 21.96  |                     |          |
| LN-340shCTRL   | JQ1              | 0.1452 | 1  | 0.1452 | F (1, 8) = 0.003922 | P=0.9516 |
|                | O6BG             | 2463   | 1  | 2463   | F (1, 8) = 22.06    | P=0.0015 |
|                | TMZ              | 4967   | 1  | 4967   | F (1, 8) = 44.49    | P=0.0002 |
|                | JQ1 x O6BG       | 26.14  | 1  | 26.14  | F (1, 8) = 0.7060   | P=0.4252 |
|                | JQ1 x TMZ        | 107.3  | 1  | 107.3  | F (1, 8) = 2.899    | P=0.1270 |
|                | O6BG x TMZ       | 588.7  | 1  | 588.7  | F (1, 8) = 5.274    | P=0.0508 |
|                | JQ1 x O6BG x TMZ | 76.88  | 1  | 76.88  | F (1, 8) = 2.076    | P=0.1876 |
|                | Subject          | 893.1  | 8  | 111.6  |                     |          |
|                | Residual         | 296.2  | 8  | 37.03  |                     |          |

## SUPPLEMENTARY FIGURES

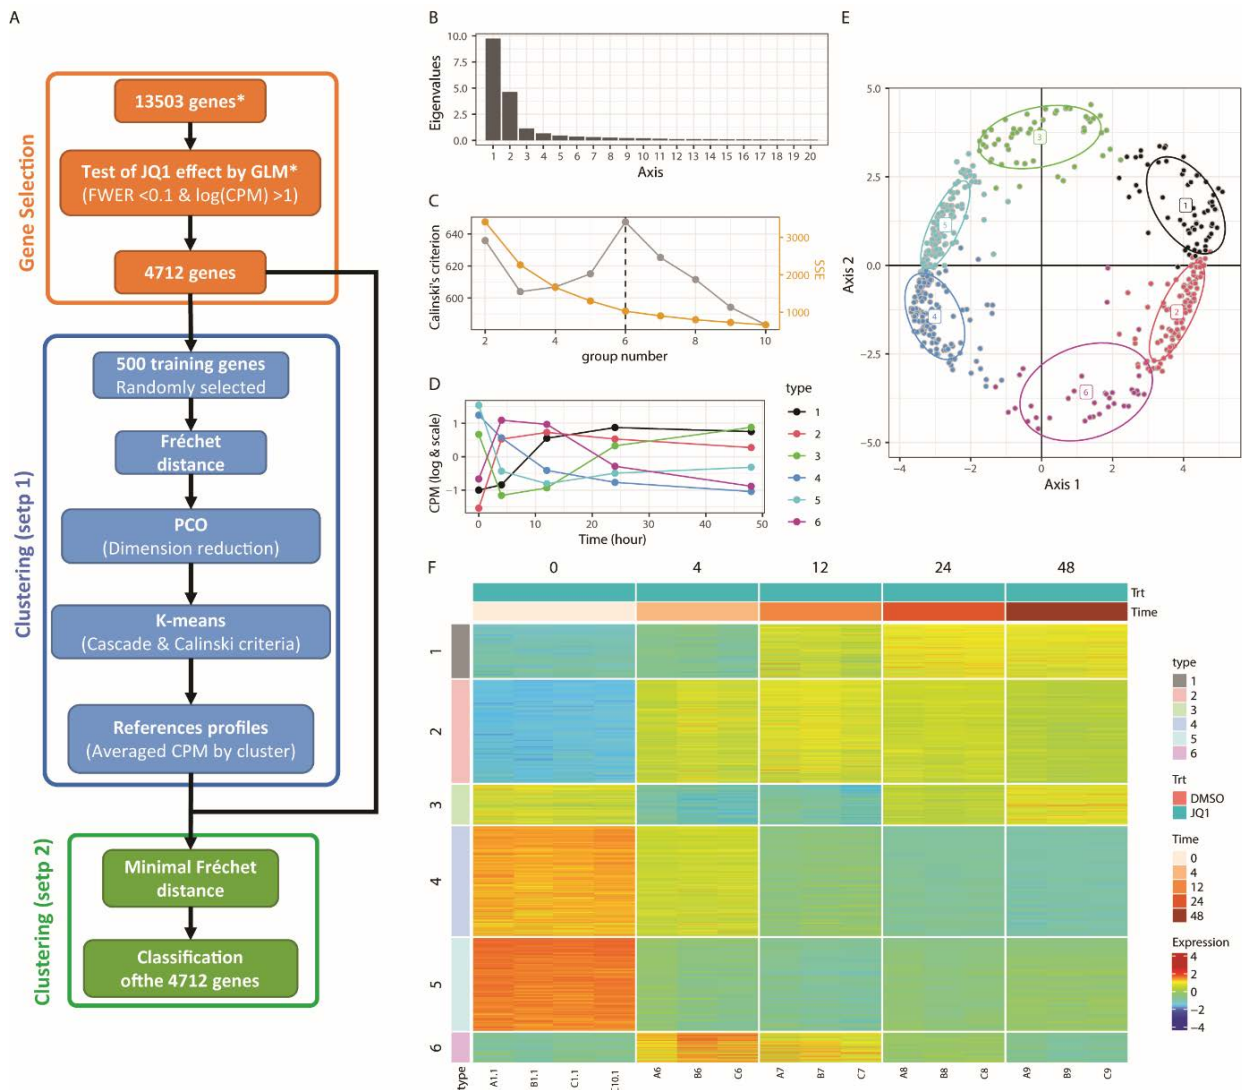

**Supplementary Figure 1.** Trajectory classification of the genes affected by JQ1-treatment. (A) Flow diagram related to the two-step classification method. The 4712 genes were initially selected by testing the interaction between time and JQ1-treatment in the GBM derived sphere line LN-2683GS<sup>4</sup>. The first step of the classification consisted in the construction of the 6 reference profiles of response to JQ1 treatment. In a second step, the group assignment for each gene was given by minimal Fréchet distance between gene profiles and reference profiles. (B) Eigenvalues from principal coordinates analysis (PCO) based on the Fréchet distance matrix of the 500 randomly selected genes. The three first components of the PCO were then used to partition the 500 selected genes. (C) The cluster (group) number from the cascade K-means analysis is represented in function of the *Calinski's criterion*<sup>5</sup> and SSE (sum of squared errors). The optimal group number is given by the maximal Calinski value (6 groups). (D) The 6 averaged expression patterns of the 500 randomly selected genes (reference profiles; CPM, counts per million) are displayed upon clustering over the time course of treatment. (E) representation of the 6 clusters on the first vectorial plane of the principal coordinates analysis (PCO) based on the 500 randomly selected genes. The heatmap (F) illustrates the normalized expression of the 4712 selected genes upon JQ1 treatment over a time course of 48h. The gene trajectories were classified in the 6 clusters of response to the treatment defined by the two-step procedure based on Fréchet distances.

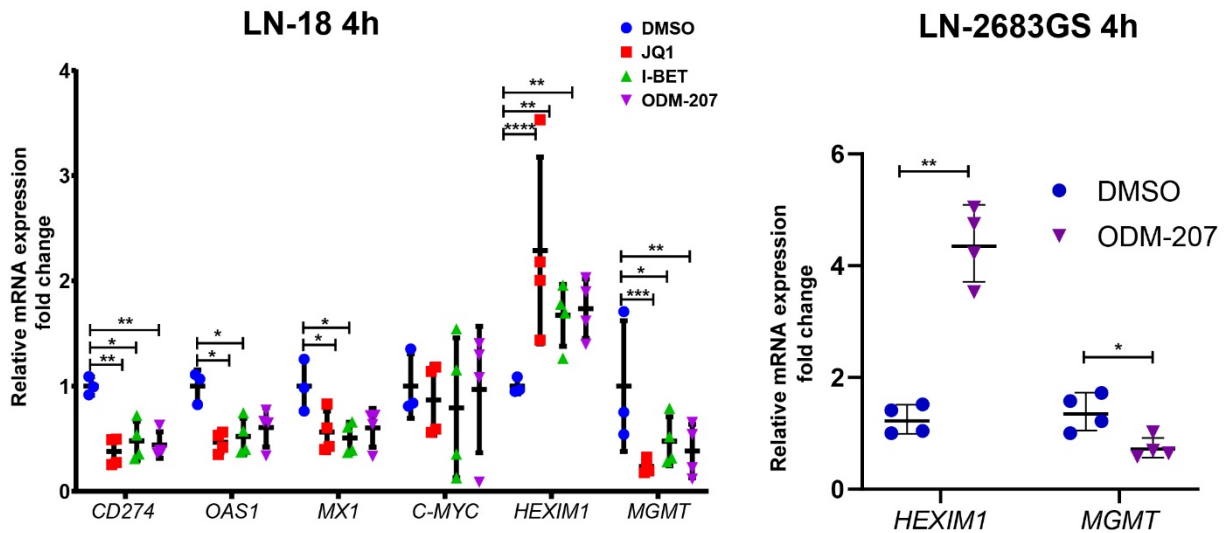

**Supplementary Figure S2.** BET-inhibitors affect gene expression similarly in *in vitro* experiments.

The GBM cell-line LN-18 with endogenous *MGMT* expression was treated for 4h with the BET-inhibitors JQ1, I-BET, or ODM-207. Expression was determined by qRT-PCR normalized to *GAPDH*. Expression was compared between the DMSO control and the respective BET-inhibitors. Data represent a summary of 3-4 independent experiments. Error bars are SD. The data is normalized to the median of DMSO treated samples. P, individual P-value (not corrected for multiple testing, exact Fisher LSD test);  $P > 0.05$ , \*  $P \leq 0.05$ , \*\*  $P \leq 0.01$ , \*\*\*  $P \leq 0.001$ , \*\*\*\*  $P \leq 0.0001$ . Primers have been reported in Gusyatiner *et al* 2021<sup>4</sup>, or in Supplemental Table S1. *HEXIM1* expression is considered a pharmacodynamic marker for target engagement and activity of BET inhibitors<sup>6</sup>. The sphere line LN-2683GS, with endogenous *MGMT* expression, was treated for 4h with DMSO or ODM-207, analysis was performed as indicated above.



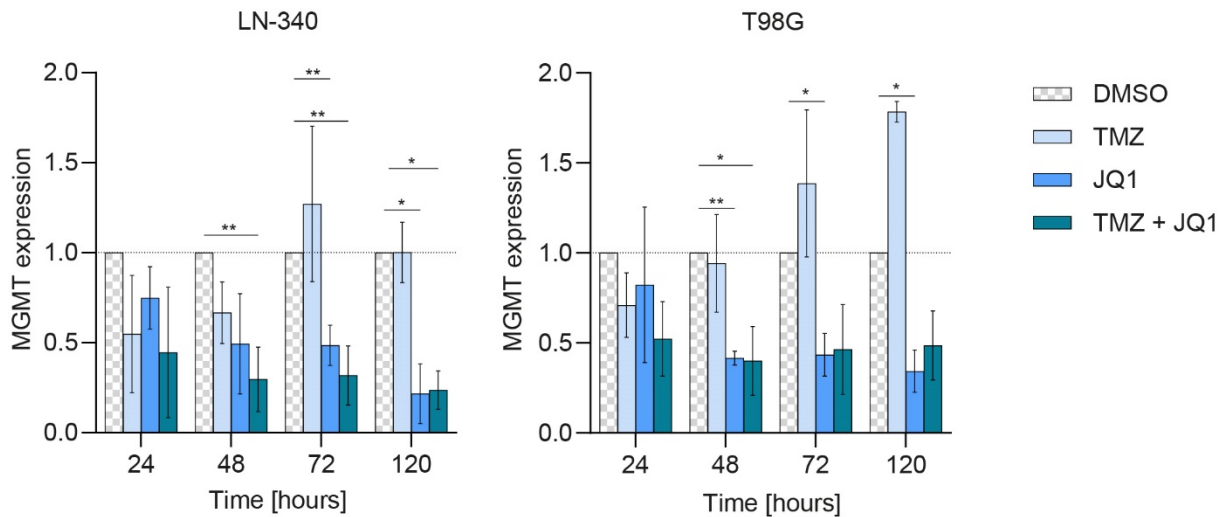

**Supplementary Figure S3. Quantification of MGMT Western blots from Figure 2B.**

The films of the western blots probed for MGMT and  $\beta$ -Actin were analyzed by densitometry. The ratio MGMT/  $\beta$ -Actin of the DMSO controls were set to 1 and served as normalizer by time point. The quantification is based on 3 biological replicates. Error bars are SD. P-values were obtained by two-way ANOVA, \* ( $p \leq 0.05$ ), \*\* ( $P \leq 0.01$ ).

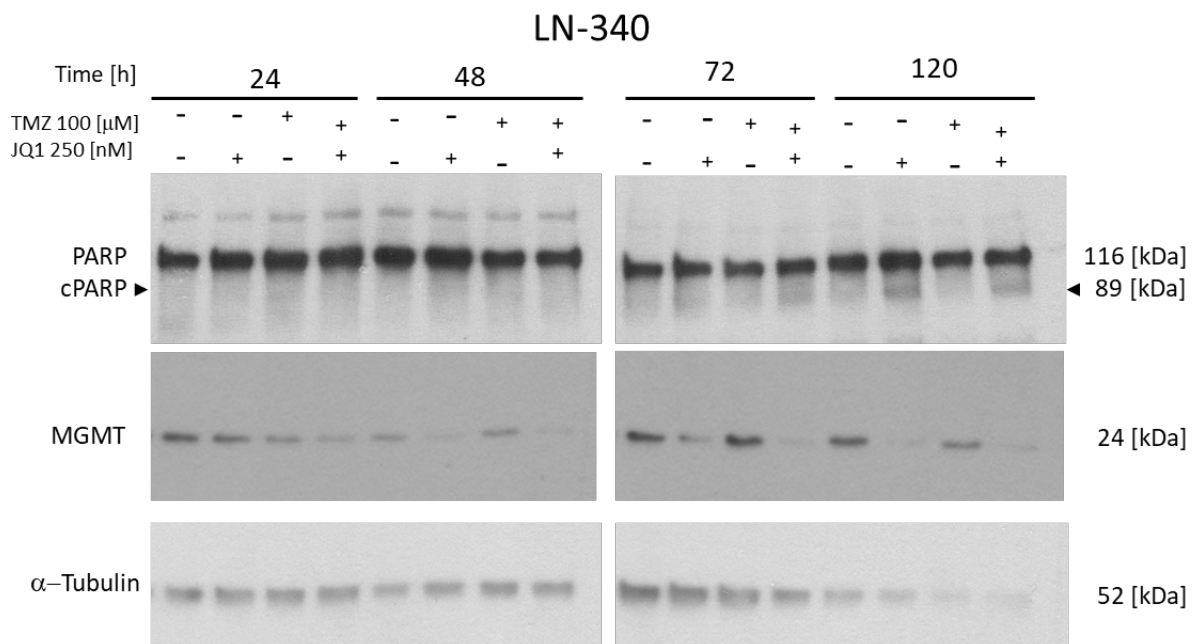

**Supplementary Figure S4. JQ1 treatment alone induces PARP cleavage.**

The experimental set-up corresponds to Figure 2B. Treatment of LN-340 with JQ1 at 250 nM JQ1 indicates PARP cleavage after 72 h and 120 h as indicated by Western. Of note, the TMZ treatment that in this experiment was administered at time 0, showed no effect on its own. This is in line with the fact that MGMT protein was present at this time point, known to rapidly repair TMZ-induced lesions. The short half-life of TMZ (1.8 h) at physiological pH precludes a TMZ effect at later time points, when MGMT is depleted by JQ1 in this experiment.

**GBM Cell & Sphere Lines**

|                                                | LN-18 | T98G | LN-340 | LN-382 | LN-2683GS |
|------------------------------------------------|-------|------|--------|--------|-----------|
| <b>MGMT</b><br>24 [kDa]                        |       |      |        |        |           |
| <b><math>\alpha</math>-Tubulin</b><br>52 [kDa] |       |      |        |        |           |
| <b>Ratio</b><br>Relative to LN-18              | 1     | 0.87 | 0.42   | 0.22   | 0.19      |

**Supplementary Figure S5. Basal MGMT expression in GBM cell and sphere lines.** MGMT protein expression normalized to LN-18 (unmethylated *MGMT* promoter).

Dox-inducible Tet-On system for MGMT in the GBM line LN-229

| Sample lane                                    | 1 | 2 | 3    | 4    | 5    | 6 | 7    | 8 | 9    | 10 | 11  |
|------------------------------------------------|---|---|------|------|------|---|------|---|------|----|-----|
| Dox [ng/mL]                                    | 0 | 0 | 50   | 100  | 200  |   | 0    |   | 250  |    | 0   |
| <b>MGMT</b><br>24 [kDa]                        |   |   |      |      |      |   |      |   |      |    |     |
| <b><math>\alpha</math>-Tubulin</b><br>52 [kDa] |   |   |      |      |      |   |      |   |      |    |     |
| Ratio (normalized to LN-18)                    | 0 | 0 | 0.12 | 0.64 | 1.49 |   | 0.05 |   | 5.09 |    | 1.0 |

**Supplementary Figure S6. Dox-Inducible MGMT in LN-229.**

The GBM cell line LN-229 transduced with a Dox-inducible *MGMT* construct was treated 48h with various concentrations of Dox (0-250ng/mL). MGMT protein expression was normalized to the endogenous MGMT levels of LN-18. 1 = LN-229 parental, 2 = LN-229MGMTind\_C12 – untreated, 3 = LN-229MGMTind\_C12 – Dox 50ng/mL, 4 = LN-229MGMTind\_C12 – Dox 100ng/mL, 5 = LN-229MGMTind\_C12 – Dox 200ng/mL, 6 = empty well, 7 = LN-229MGMTind\_pool – untreated, 8 = empty well, 9 = LN-229MGMTind\_pool – Dox 250ng/mL, 10 = empty well, 11 = LN-18 (MGMT positive control).

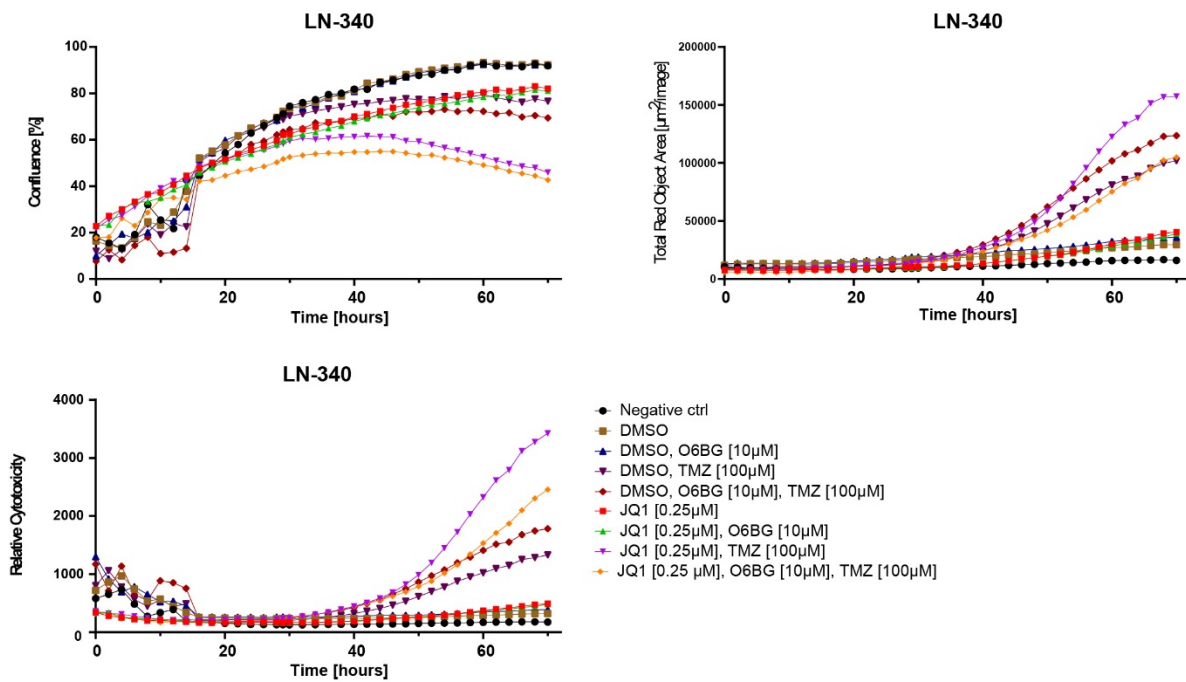

**Supplementary Figure S7. Relative cytotoxicity monitored by live imaging.**

Relative cytotoxicity was assessed in LN-340 by Incucyte Zoom imaging (Cytotox Red/Confluence). Cells were treated with JQ1 for 5 days at [0.25 $\mu\text{M}$ ]. On day 5, cells were treated with O6BG [10  $\mu\text{M}$ ] alone, or together with TMZ [100  $\mu\text{M}$ ]. Two additional TMZ treatments were given every 6h, for a total of 3 TMZ treatments on day 5. End-point was set at 70h after TMZ treatments. Cell confluence is measured as % coverage by phase contrast, and cell death, as area of Cytotox Red fluorescence in the red channel,  $\mu\text{m}^2/\text{image}$ . Data represent the mean of 3 technical replicates of one of 4 biological replicates quantified in Figure 5B.

**A**

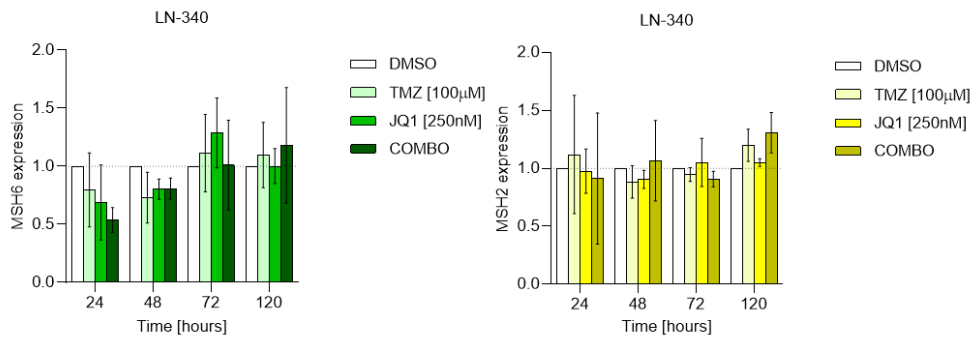

**B**

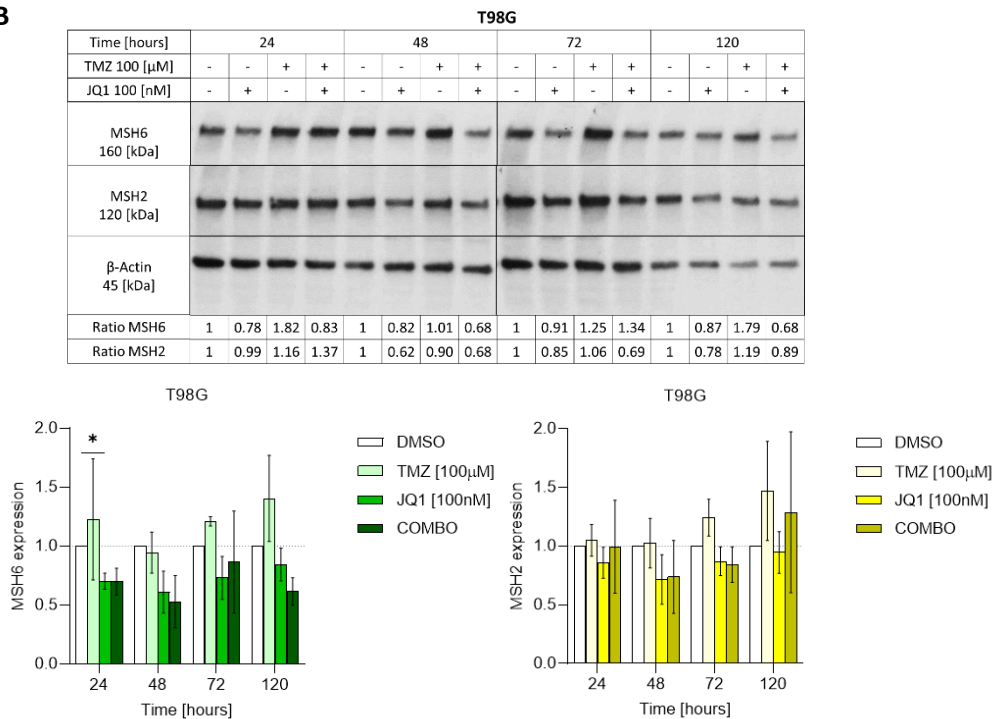

**C**

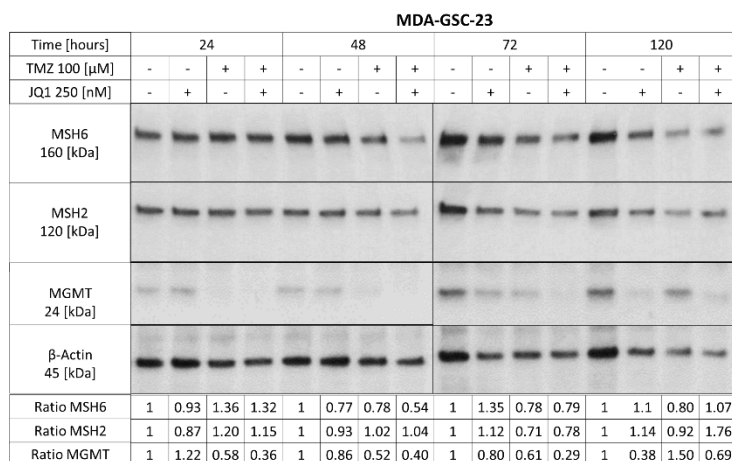

**Supplementary Figure S8. BETi does not impair the MMR pathway in GBM.**

The effect of JQ1 on the expression of the MMR proteins MSH6 and MSH2 is shown for GBM cell and sphere lines over a time course of 24 to 120h, with or without treatment with TMZ (at time 0) as indicated. The films of the western blots, probed for the different proteins and β-

Actin, were analyzed by densitometry. The ratio of the proteins of interest / $\beta$ -Actin of the DMSO controls were set to 1 and served as normalizer by time point. **A** Quantification of the Western blots from LN-340 based on 3 biological replicates associated to Figure 6B. **B** Representative Western blots are shown for T98G, and respective quantification based on 3 biological replicates. **C** Western blots are shown for the sphere line MDA-GSC-23<sup>luc</sup> for MSH6, MSH2, and MGMT. The p-values were determined by two-way ANOVA. Error bars are SD, \*( $p \leq 0.5$ ).

## References

1. Esteller M, Hamilton SR, Burger PC, Baylin SB, Herman JG. Inactivation of the DNA repair gene O6-methylguanine-DNA methyltransferase by promoter hypermethylation is a common event in primary human neoplasia. *Cancer Res* 1999, **59**(4): 793-797.
2. Palmisano WA, Divine KK, Saccomanno G, Gilliland FD, Baylin SB, Herman JG, *et al.* Predicting lung cancer by detecting aberrant promoter methylation in sputum. *Cancer Research* 2000, **60**(21): 5954-5958.
3. Sciuscio D, Diserens AC, van Dommelen K, Martinet D, Jones G, Janzer RC, *et al.* Extent and patterns of MGMT promoter methylation in glioblastoma- and respective glioblastoma-derived spheres. *Clin Cancer Res* 2011, **17**(2): 255-266.
4. Gussyatiner O, Bady P, Pham MDT, Lei Y, Park J, Daniel RT, *et al.* BET inhibitors repress expression of interferon-stimulated genes and synergize with HDAC inhibitors in glioblastoma. *Neuro Oncol* 2021, **23**(10): 1680-1692.
5. Milligan GW, Cooper MC. An examination of procedures for determining the number of clusters in a data set. *Psychometrika* 1985, **50**(2): 159-179.
6. Lin X, Huang X, Uziel T, Hessler P, Albert DH, Roberts-Rapp LA, *et al.* HEXIM1 as a robust pharmacodynamic marker for monitoring target engagement of BET family bromodomain inhibitors in tumors and surrogate tissues. *Mol Cancer Ther* 2017, **16**(2): 388-396.
