# Supplementary material for: BET protein inhibition sensitizes glioblastoma cells to temozolomide treatment by attenuating MGMT expression
Source: PubMed Central journal article supplement (PMC9747918; doi:10.1038/s41419-022-05497-y), 2022-12-13

# Full WESTERN Blots – Tancredi et al

## 1. Biological replicate shown cropped in Figure 2B

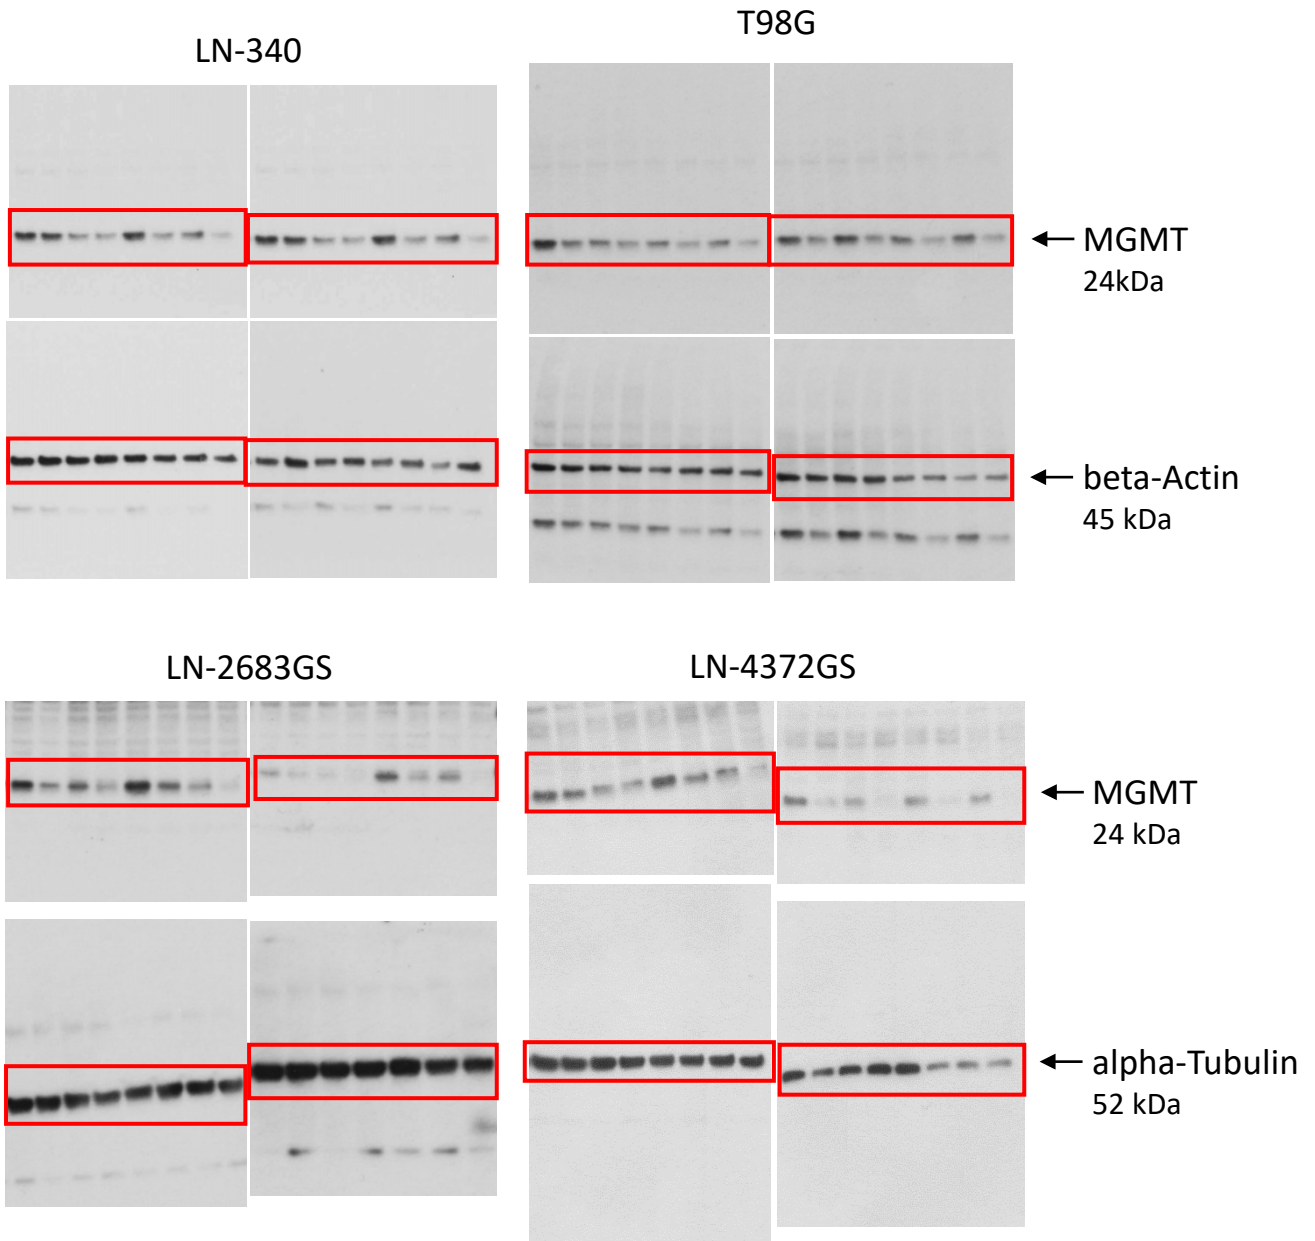

## Description of samples and treatments

| Time [hours] | 24 |   |   |   | 48 |   |   |   | 72 |   |   |   | 120 |   |   |   |
|--------------|----|---|---|---|----|---|---|---|----|---|---|---|-----|---|---|---|
| TMZ          | -  | - | + | + | -  | - | + | + | -  | - | + | + | -   | - | + | + |
| JQ1          | -  | + | - | + | -  | + | - | + | -  | + | - | + | -   | + | - | + |

## 2. Second biological replicate for Figure 2B

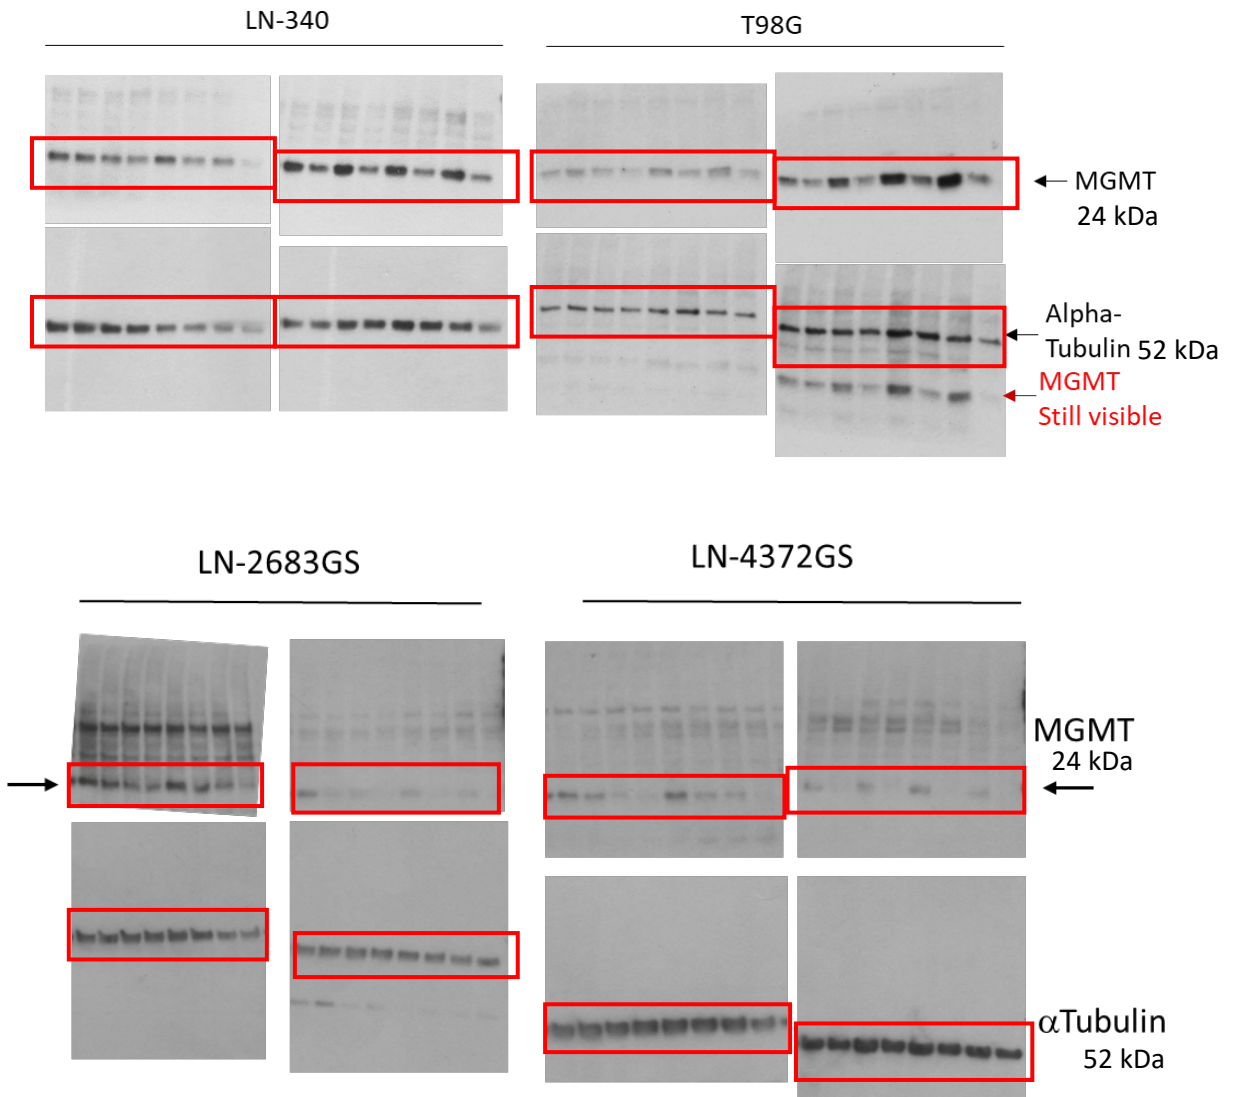

### Description of samples and treatments

| Time [hours] | 24 |   |   |   | 48 |   |   |   | 72 |   |   |   | 120 |   |   |   |
|--------------|----|---|---|---|----|---|---|---|----|---|---|---|-----|---|---|---|
| TMZ          | -  | - | + | + | -  | - | + | + | -  | - | + | + | -   | - | + | + |
| JQ1          | -  | + | - | + | -  | + | - | + | -  | + | - | + | -   | + | - | + |

### 3. Biological replicate shown cropped in Figure 6A

#### LN-340

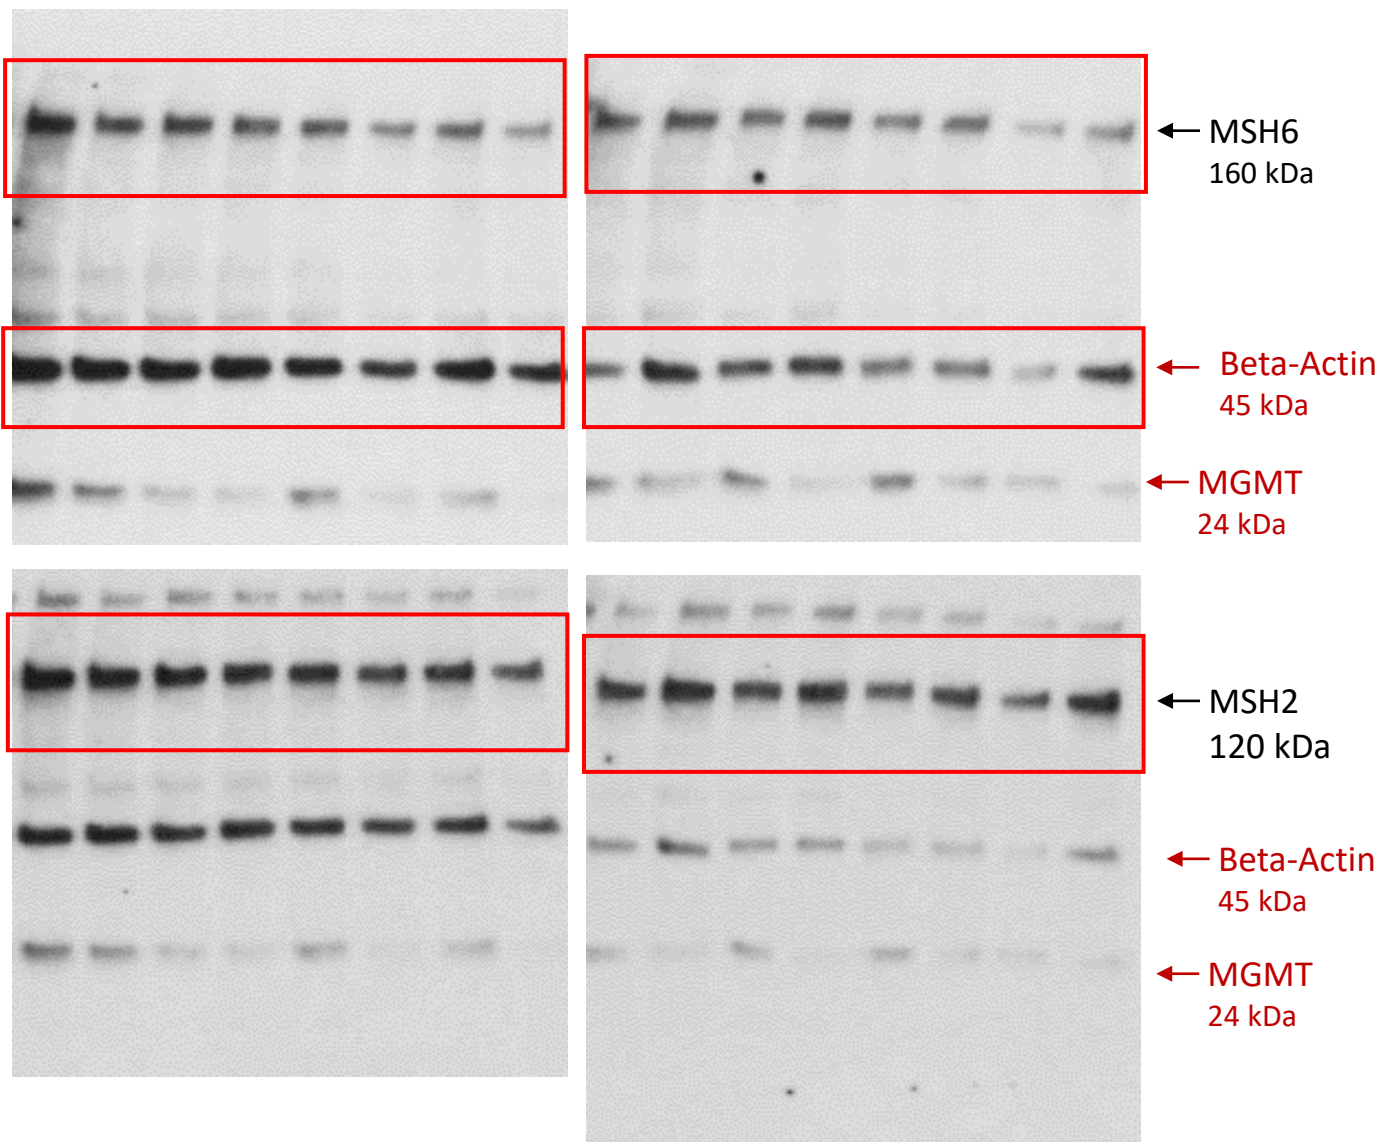

→ Same membrane from Figure 2B – MGMT and beta-Actin still visible

#### Description of samples and treatments

| Time [hours] | 24 |   |   |   | 48 |   |   |   | 72 |   |   |   | 120 |   |   |   |
|--------------|----|---|---|---|----|---|---|---|----|---|---|---|-----|---|---|---|
| TMZ          | -  | - | + | + | -  | - | + | + | -  | - | + | + | -   | - | + | + |
| JQ1          | -  | + | - | + | -  | + | - | + | -  | + | - | + | -   | + | - | + |

#### 4. Biological replicate shown cropped in Figure 6D

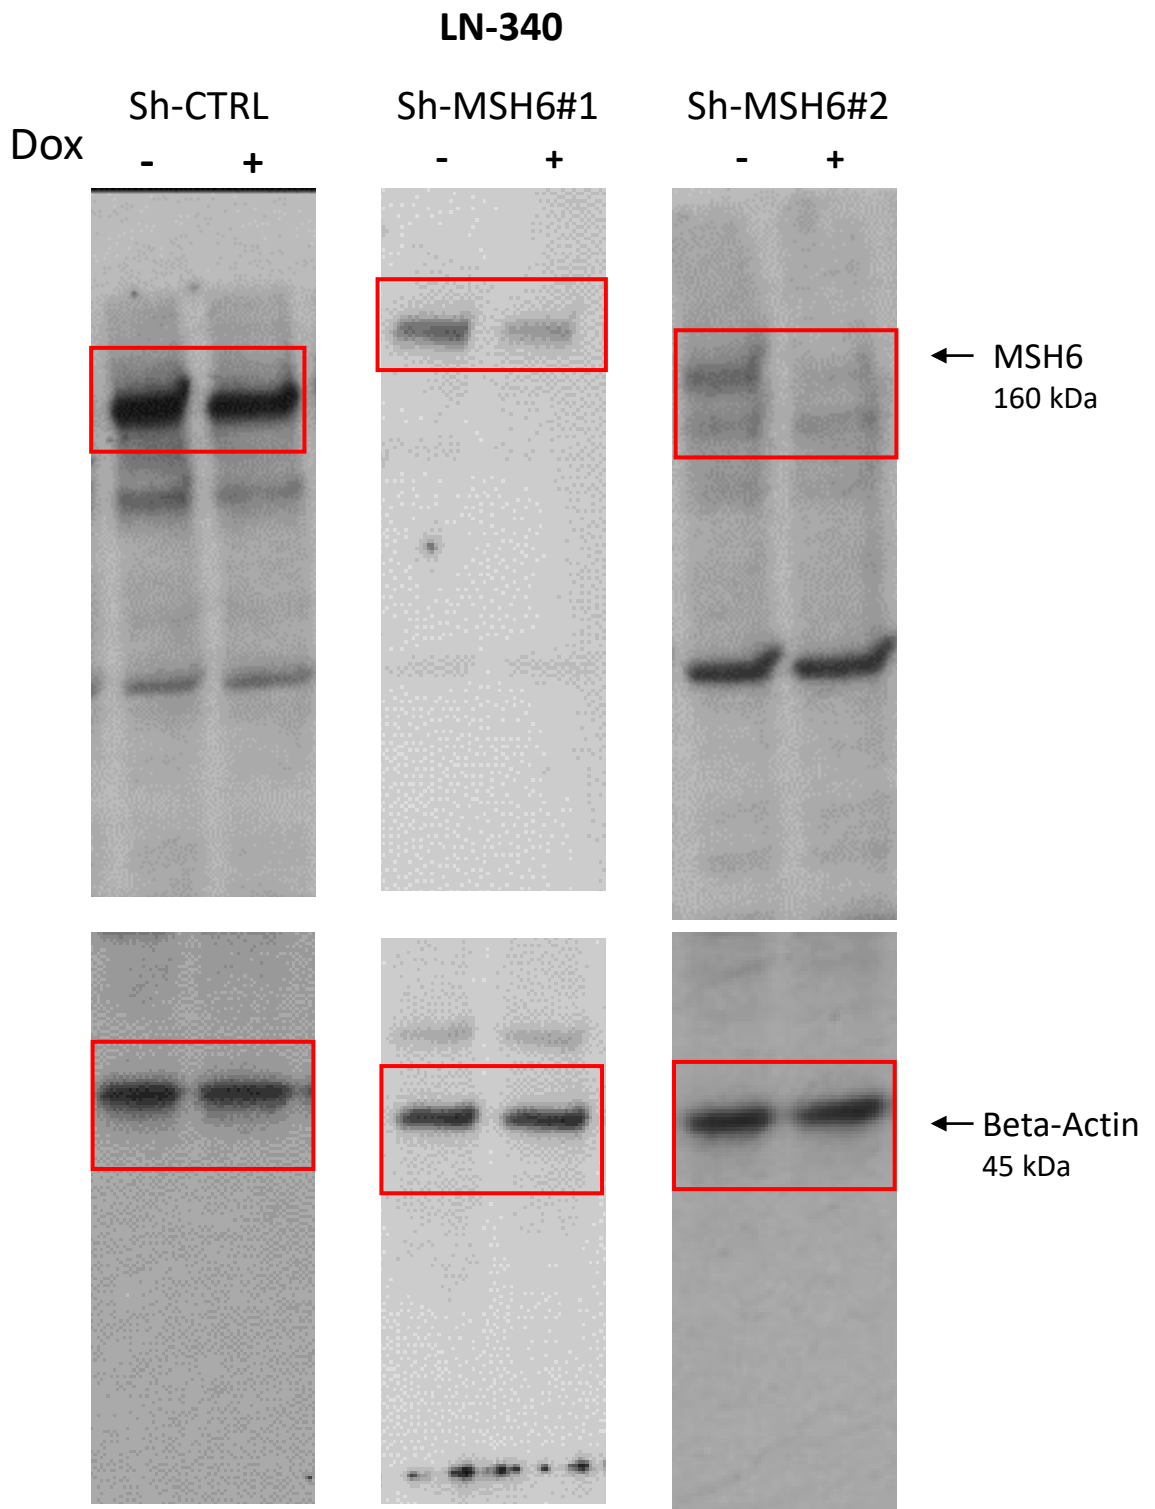

Supplement: 41419_2022_5497_MOESM3_ESM.pdf [file 41419_2022_5497_MOESM3_ESM.pdf]
